# Supplementary material
Source: PubMed Central journal article supplement (PMC9616288)
Supplement: mmc1.pdf [file mmc1.pdf]

## Genetic Liability to Cannabis Use Disorder and COVID-19 Hospitalization

### Supplemental Information

**Supplemental Table S1.** COVID-19 Genetic Correlations When Accounting for Potential Confounding Variables in Primary Analysis but excluding the Townsend Deprivation Index.

| Substance Use Phenotype        | CUD           | $\beta$ Substance Use Phenotype <sup>a</sup> | EA             | BMI           | FEV   | Fast Gluc | $\beta$ Risk | $\beta$ ADHD |
|--------------------------------|---------------|----------------------------------------------|----------------|---------------|-------|-----------|--------------|--------------|
| <b>Cannabis Use</b>            | <b>0.541*</b> | -0.272                                       | -0.010         | <b>0.322*</b> | 0.020 | -0.021    | -0.006       | -0.046       |
| <b>CPD</b>                     | <b>0.364*</b> | 0.036                                        | <b>-0.186*</b> | <b>0.324*</b> | 0.014 | 0.007     | -0.029       | -0.106       |
| <b>Age Smoke</b>               | <b>0.387*</b> | 0.072                                        | <b>-0.211*</b> | <b>0.333*</b> | 0.011 | 0.010     | -0.027       | -0.074       |
| <b>Smoking Cessation</b>       | <b>0.363*</b> | -0.171                                       | -0.112         | <b>0.321*</b> | 0.019 | -0.002    | -0.055       | -0.103       |
| <b>Ever Smoke</b>              | <b>0.434*</b> | -0.128                                       | <b>-0.188*</b> | <b>0.343*</b> | 0.012 | -0.004    | -0.030       | -0.057       |
| <b>Problematic Alcohol Use</b> | 0.295         | 0.148                                        | <b>-0.198*</b> | <b>0.338*</b> | 0.009 | 0.009     | -0.039       | -0.110       |

**Note.** Standardized beta estimates for Cannabis Use Disorder (CUD) and substance use phenotypes were taken from a multiple regression parameterized in gSEM. <sup>a</sup>Substance use phenotypes were entered and tested separately to avoid multicollinearity amongst them. Each row represents genetic correlations with COVID-19 hospitalization from one model. The multiple rows indicate the separate models run substituting each substance use phenotype (listed in the first column). The model was COVID hospitalization = CUD + substance use phenotype + BMI + Educational Attainment + Forced Expiration + Fasting Glucose + ADHD + Risk-taking + error. The original GWAS accounted for standard GWAS covariates (age, sex, genetic principal components, etc). **Bold\*** represents  $p < .05$ . CUD = Cannabis Use Disorder, Cannabis Use = any lifetime cannabis use, CPD = Cigarettes per day, Age Smoke = Age of smoking initiation, Ever Smoke = Ever smoking tobacco, EA = educational attainment, , BMI = body mass index, FEV = 1 second forced expiration volume, Fast Gluc = fasting glucose, ADHD = attention deficit hyperactivity disorder, Risk = Risk-taking.

**Supplemental Table S2.** COVID-19 Genetic Correlations When Accounting for Potential Confounding Variables that are diagnostic indices of chronic conditions. We estimated the genetic correlation between CUD and COVID-19 hospitalization, while accounting for the same substance use phenotypes, educational attainment (EDU), BMI, Townsend Deprivation Index (TDI) and impulsivity (risk-taking and ADHD) GWAS but instead of FEV (1-second Forced Expiratory Volume), we included COPD as a covariate and instead of Fasting Glucose, we included GWAS summary data for Type 2 Diabetes and Hypertension.

| Substance Use Phenotype        | $\beta$ CUD   | $\beta$ Substance Use Phenotype <sup>#</sup> | $\beta$ EDU   | $\beta$ COPD | $\beta$ Hypertension | $\beta$ BMI   | $\beta$ T2D  | $\beta$ TDI | $\beta$ Risk | $\beta$ ADHD |
|--------------------------------|---------------|----------------------------------------------|---------------|--------------|----------------------|---------------|--------------|-------------|--------------|--------------|
| <b>Cannabis Use</b>            | <i>0.502</i>  | -0.266                                       | 0.028         | 0.003        | 0.311                | <i>0.186</i>  | 0.180        | 0.011       | 0.015        | -0.244       |
| <b>CPD</b>                     | <b>0.378*</b> | -0.094                                       | <i>-0.154</i> | 0.010        | 0.342                | <b>0.204*</b> | 0.222        | -0.067      | -0.004       | -0.263       |
| <b>Age Smoke</b>               | <b>0.390*</b> | 0.096                                        | <i>-0.189</i> | 0.004        | 0.313                | <b>0.200*</b> | <i>0.206</i> | 0.032       | -0.066       | -0.246       |
| <b>Smoking Cessation</b>       | <b>0.377*</b> | -0.064                                       | -0.136        | 0.010*       | 0.271                | <i>0.204</i>  | 0.196        | -0.099      | -0.016       | -0.245       |
| <b>Ever Smoke</b>              | <b>0.456*</b> | -0.207                                       | -0.150        | 0.005        | 0.354                | <b>0.205*</b> | 0.198        | -0.043      | -0.005       | -0.239       |
| <b>Problematic Alcohol Use</b> | <i>0.308</i>  | 0.147                                        | <i>-0.177</i> | 0.004        | 0.288                | <b>0.210*</b> | <i>0.217</i> | -0.107      | -0.017       | -0.268       |

**Note.** Standardized beta estimates for Cannabis Use Disorder (CUD) and substance use phenotypes were taken from a multiple regression parameterized in gSEM. <sup>#</sup>Substance use phenotypes were entered and tested separately to avoid multicollinearity amongst them. Each row represents genetic correlations with COVID-19 hospitalization from one model. The multiple rows indicate the separate models run substituting each substance use phenotype (listed in the first column). The model was COVID hospitalization = CUD + substance use phenotype + BMI + Educational Attainment + COPD + Hypertension + BMI + Diabetes + ADHD + Risk-taking + error. The original GWAS accounted for standard GWAS covariates (age, sex, genetic principal components, etc). **Bold\*** represents  $p < .05$ . *Italics* represents marginal significance at .10. CUD = Cannabis Use Disorder, Cannabis Use = any lifetime cannabis use, CPD = Cigarettes per day, Age Smoke = Age of smoking initiation, Ever Smoke = Ever smoking tobacco, EDU = educational attainment, TDI = Townsend deprivation index, BMI = body mass index, ADHD = attention deficit hyperactivity disorder, Risk = Risk-taking, COPD= Chronic Obstructive Pulmonary Disease; T2D=Type 2 Diabetes.

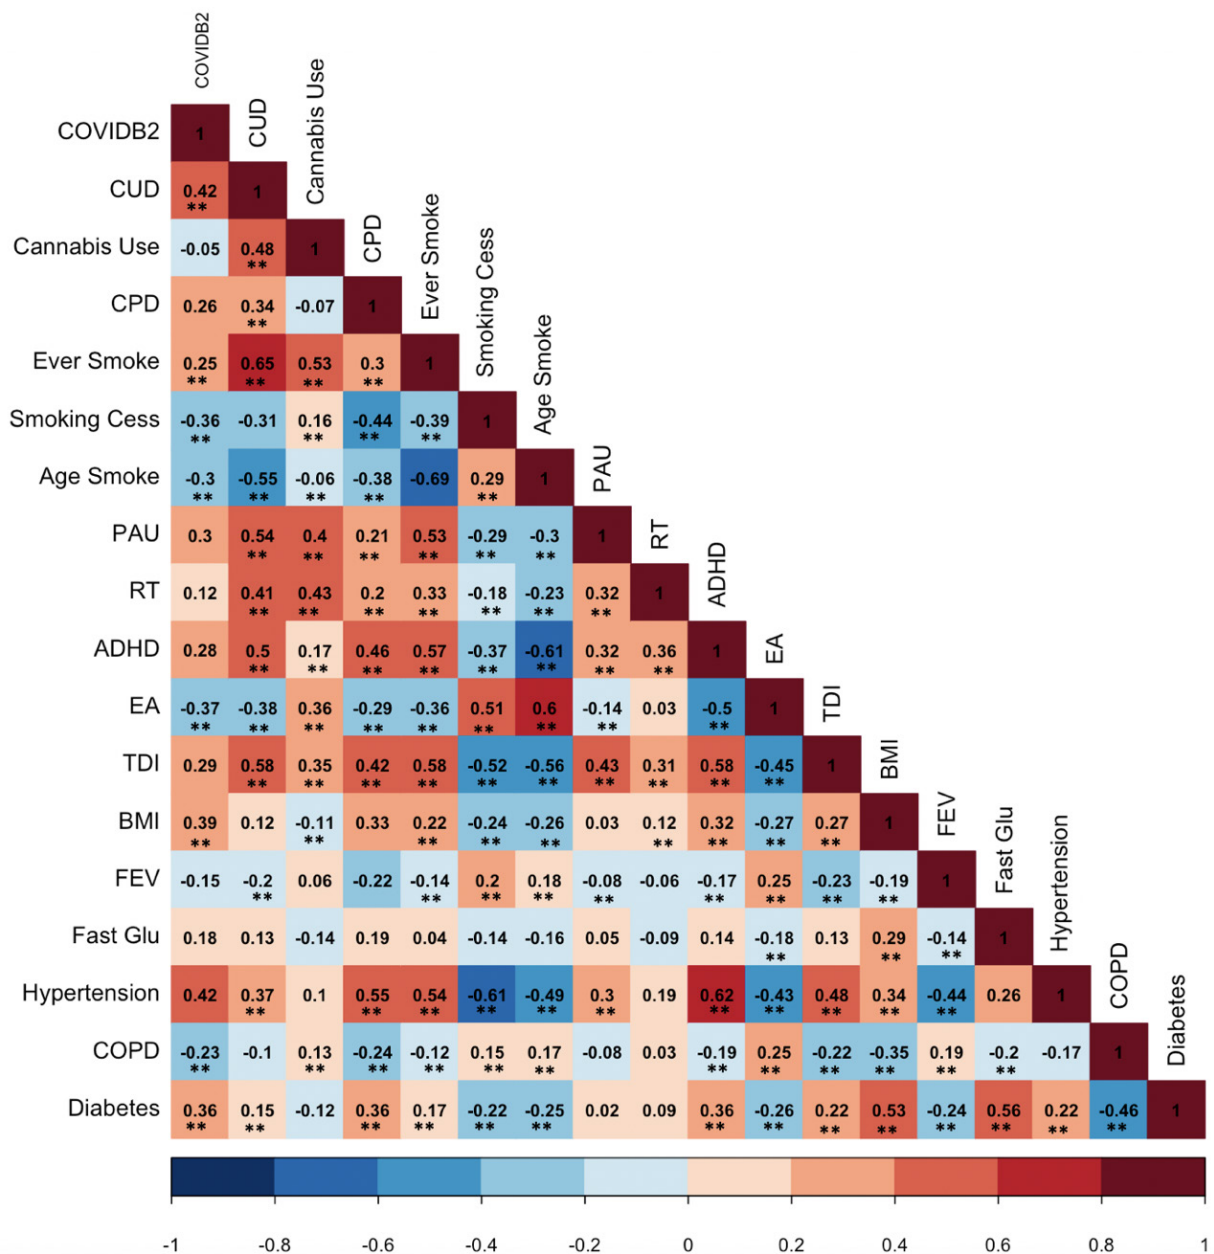

**Supplemental Figure S1.** Expanded correlation matrix of traits, including disease and dimensional traits, visualized as a heat map. COVID-19 Hosp = COVID-19 hospitalization (Variable COVIDB2 from the COVID Host Genomics initiative (4)). TDI = Townsend Deprivation Index, EA = Education attainment, BMI = Body Mass Index. FEV = Forced Expiration Volume for 1 second, Fast Gluc = Fasting Glucose, Age Smoke = Age of smoking initiation. RT=Risk-taking. COPD = Chronic Obstructive Pulmonary Disease \*\*=Bonferroni significant for all test run.
